# Supplementary material
Source: PubMed Central journal article supplement (PMC2734136)
Supplement: msp025_1.pdf [file msp025_1.pdf]

**Table S1: Pooling of HGDP populations for microsatellite ASD computation**

| number of individuals | HGDP ID | HGDP Population  | Country                | Geographic Region  | Population Pool ID |
|-----------------------|---------|------------------|------------------------|--------------------|--------------------|
| 15                    | 20      | Orcadian         | OrkneyIslands          | EUROPE             | EUR                |
| 17                    | 21      | Adygei           | Russia-Caucasus        | EUROPE             | EUR                |
| 25                    | 22      | Russian          | Russia                 | EUROPE             | EUR                |
| 24                    | 24      | Basque           | France                 | EUROPE             | EUR                |
| 28                    | 25      | French           | France                 | EUROPE             | EUR                |
| 13                    | 27      | Italian          | Italy-Bergamo          | EUROPE             | EUR                |
| 28                    | 28      | Sardinian        | Italy                  | EUROPE             | EUR                |
| 8                     | 29      | Tuscan           | Italy                  | EUROPE             | EUR                |
| 29                    | 34      | Mozabite         | Algeria-Mzab           | MIDDLE_EAST        |                    |
| 46                    | 36      | Bedouin          | Israel-Negev           | MIDDLE_EAST        |                    |
| 42                    | 37      | Druze            | Israel-Carmel          | MIDDLE_EAST        |                    |
| 46                    | 38      | Palestinian      | Israel-Central         | MIDDLE_EAST        |                    |
| 24                    | 50      | Balochi          | Pakistan               | CENTRAL_SOUTH_ASIA |                    |
| 25                    | 51      | Brahui           | Pakistan               | CENTRAL_SOUTH_ASIA |                    |
| 25                    | 52      | Burusho          | Pakistan               | CENTRAL_SOUTH_ASIA |                    |
| 22                    | 54      | Hazara           | Pakistan               | CENTRAL_SOUTH_ASIA |                    |
| 23                    | 56      | Kalash           | Pakistan               | CENTRAL_SOUTH_ASIA |                    |
| 25                    | 57      | Makrani          | Pakistan               | CENTRAL_SOUTH_ASIA |                    |
| 24                    | 58      | Pathan           | Pakistan               | CENTRAL_SOUTH_ASIA |                    |
| 24                    | 59      | Sindhi           | Pakistan               | CENTRAL_SOUTH_ASIA |                    |
| 11                    | 71      | Melanesian       | Bougainville           | OCEANIA            |                    |
| 17                    | 75      | Papuan           | NewGuinea              | OCEANIA            | AUS                |
| 7                     | 81      | Colombian        | Colombia               | AMERICA            |                    |
| 14                    | 82      | Karitiana        | Brazil                 | AMERICA            |                    |
| 8                     | 83      | Surui            | Brazil                 | AMERICA            |                    |
| 21                    | 86      | Maya             | Mexico                 | AMERICA            |                    |
| 14                    | 87      | Pima             | Mexico                 | AMERICA            |                    |
| 8                     | 430     | BantuSouthAfrica | SouthAfrica            | AFRICA             | YRI                |
| 11                    | 441     | BantuKenya       | Kenya                  | AFRICA             | YRI                |
| 22                    | 464     | Mandenka         | Senegal                | AFRICA             | YRI                |
| 22                    | 465     | Yoruba           | Nigeria                | AFRICA             | YRI                |
| 23                    | 488     | BiakaPygmy       | CentralAfricanRepublic | AFRICA             | BIA                |
| 13                    | 489     | MbutiPygmy       | Congo                  | AFRICA             | MBU                |
| 6                     | 494     | San              | Namibia                | AFRICA             | SAN                |
| 34                    | 601     | Han              | China                  | EAST_ASIA          | ASN                |
| 10                    | 602     | Han-NChina       | China                  | EAST_ASIA          | ASN                |
| 10                    | 606     | Dai              | China                  | EAST_ASIA          | ASN                |
| 10                    | 607     | Daur             | China                  | EAST_ASIA          |                    |
| 9                     | 608     | Hezhen           | China                  | EAST_ASIA          |                    |
| 8                     | 611     | Lahu             | China                  | EAST_ASIA          | ASN                |
| 10                    | 612     | Miao             | China                  | EAST_ASIA          | ASN                |
| 9                     | 613     | Oroqen           | China                  | EAST_ASIA          |                    |
| 10                    | 615     | She              | China                  | EAST_ASIA          | ASN                |
| 10                    | 616     | Tujia            | China                  | EAST_ASIA          | ASN                |
| 10                    | 617     | Tu               | China                  | EAST_ASIA          | ASN                |
| 9                     | 618     | Xibo             | China                  | EAST_ASIA          | ASN                |
| 10                    | 619     | Yi               | China                  | EAST_ASIA          | ASN                |
| 10                    | 622     | Mongola          | China                  | EAST_ASIA          | ASN                |
| 9                     | 625     | Naxi             | China                  | EAST_ASIA          | ASN                |
| 10                    | 629     | Uygur            | China                  | CENTRAL_SOUTH_ASIA |                    |
| 10                    | 677     | Cambodian        | Cambodia               | EAST_ASIA          | ASN                |
| 29                    | 684     | Japanese         | Japan                  | EAST_ASIA          |                    |
| 25                    | 699     | Yakut            | Siberia                | EAST_ASIA          |                    |

**Table S1: Defining Chimpanzee populations for microsatellite ASD computation**

|         | Becquet et al. IDs           |
|---------|------------------------------|
| Central | 1-16                         |
| Eastern | 18-22                        |
| Western | 24-75, except 54, 65, 68, 69 |
| Bonobo  | 79-84                        |
